# Supplementary material for: Defining the activity of pro-reparative extracellular vesicles in wound healing based on miRNA payloads and cell type-specific lineage mapping
Source: PubMed Central journal article supplement (PMC11403212; doi:10.1016/j.ymthe.2024.02.019), 2024-02-19
Supplement: mmc1.pdf [file mmc1.pdf]

**YMTHE, Volume 32**

## **Supplemental Information**

**Defining the activity of pro-reparative extracellular  
vesicles in wound healing based on miRNA  
payloads and cell type-specific lineage mapping**

**Dong Jun Park, Woil Choi, Sakeef Sayeed, Robert A. Dorschner, Joseph Rainaldi, Kayla Ho, Jenny Kezios, John P. Nolan, Prashant Mali, Todd Costantini, and Brian P. Eliceiri**

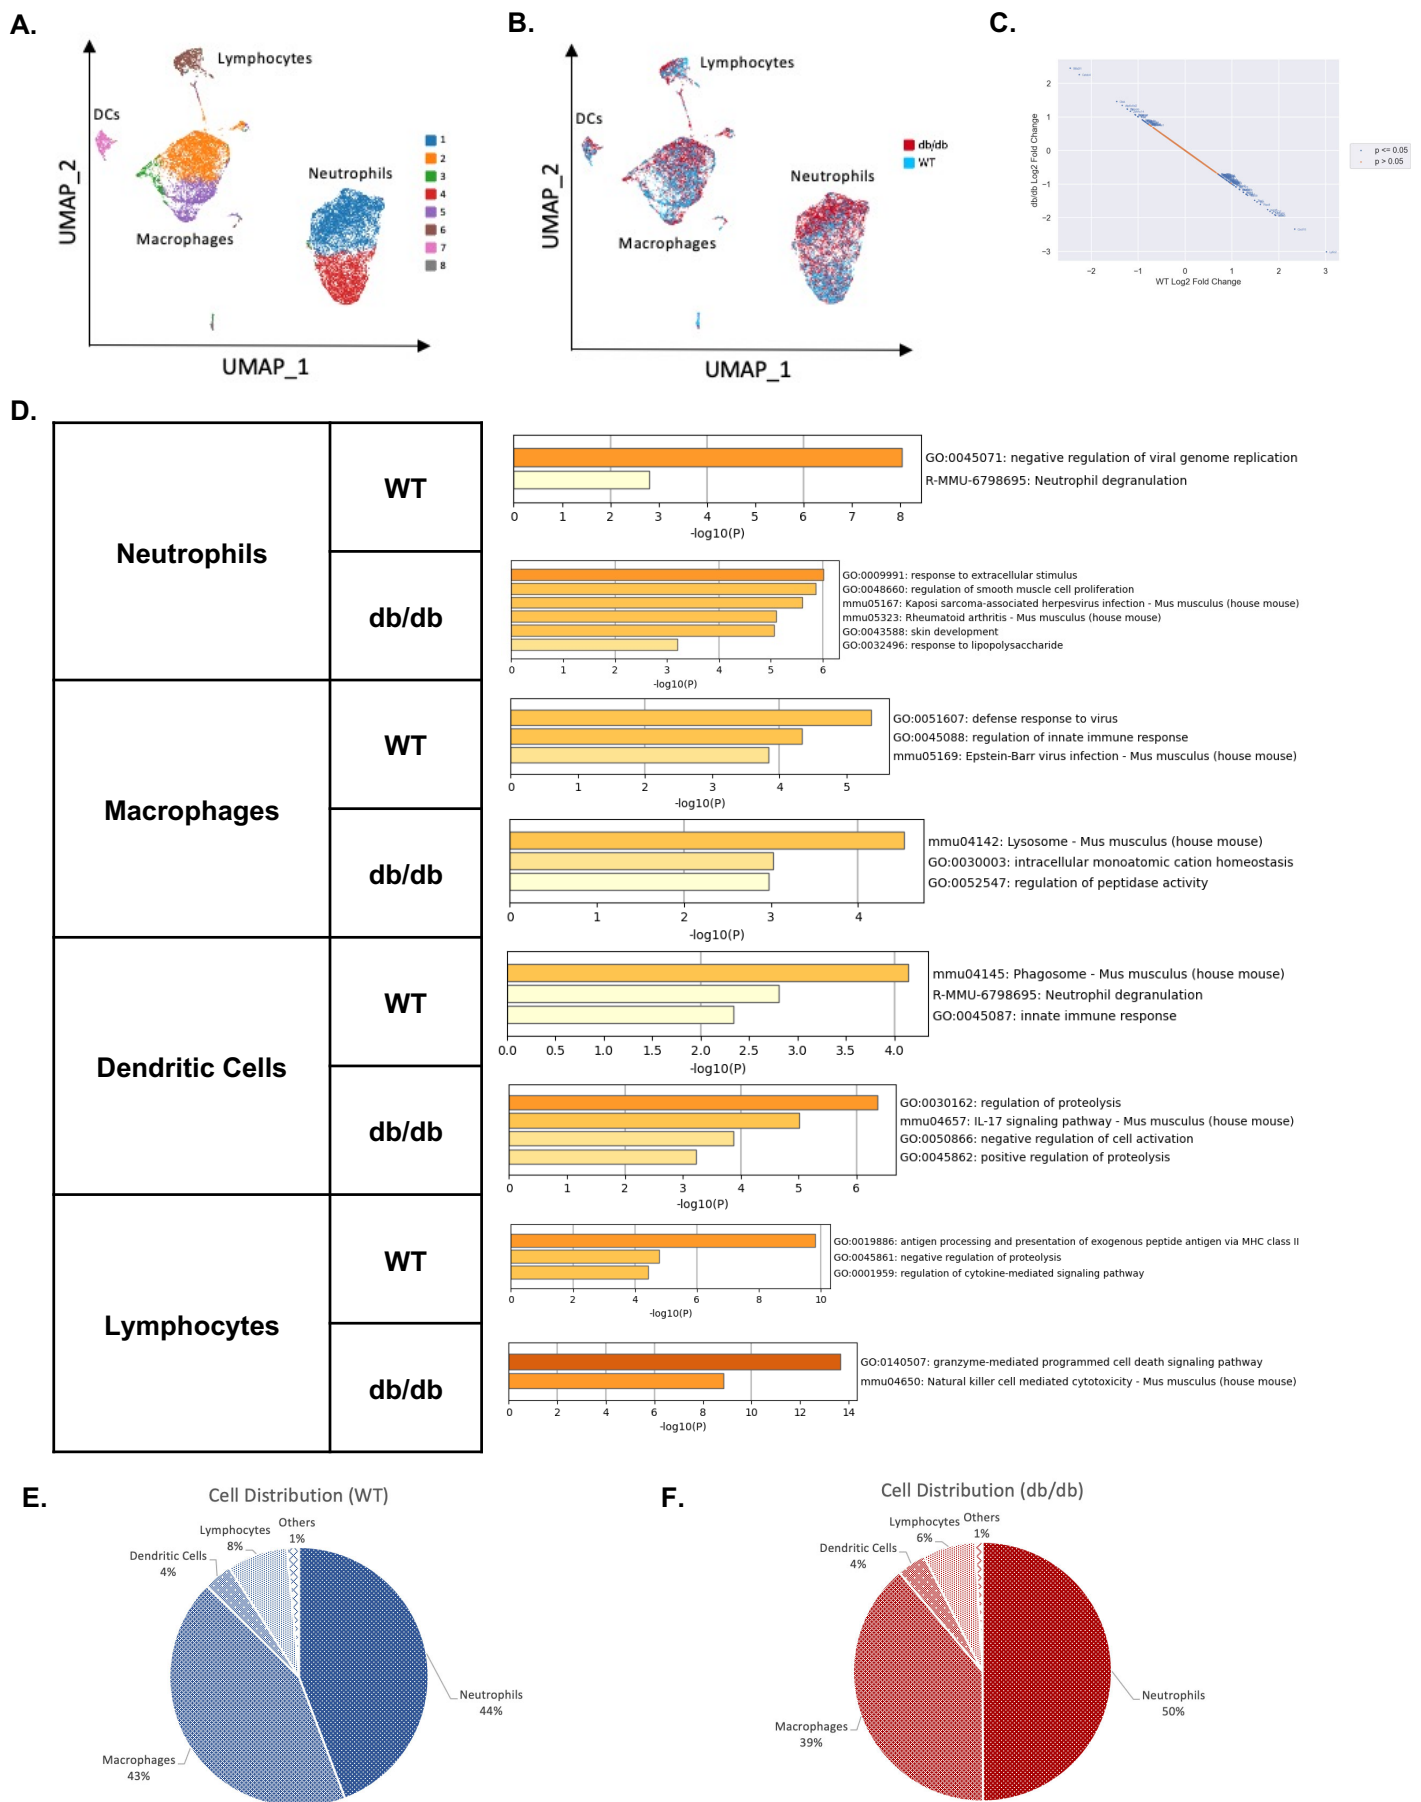

**Figure S1. Supporting data for scRNAseq of cells isolated from WT vs db/db donor PVA sponges.** (A) Distribution of cell types based on clustering of WT and db/db cells merged. (B) Comparison of cell type clusters based on WT (Blue) vs db/db (red). (C) Statistical analysis of changes in scRNAseq transcript levels in WT vs. db/db mice (n=3 pooled mice from each genotype). (D) GO term analysis comparing changes in gene expression focusing on neutrophils, macrophages, dendritic cells, and lymphocytes. (E and F) Distribution of cell types based on UMAP clustering of canonical genes for each cell type (See Supplementary Table 1 for gene list).

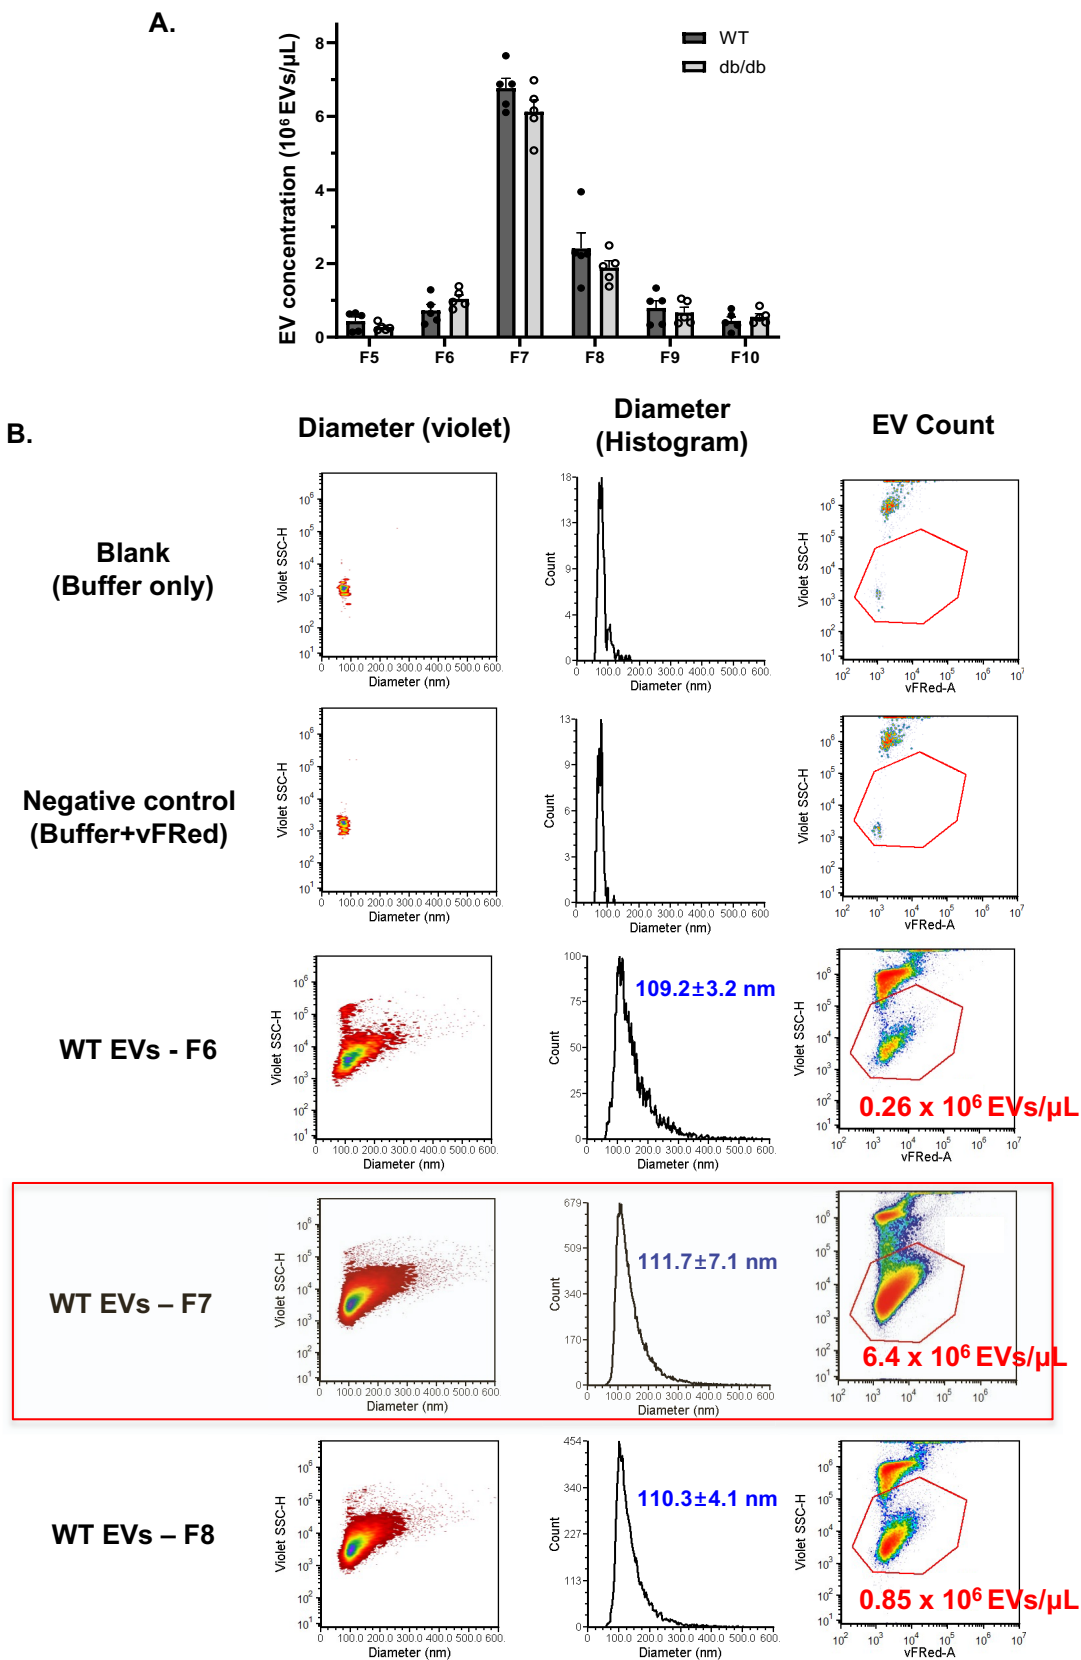

**Figure S2. Controls for single vesicle flow cytometry (vFC) based on purification of samples by size exclusion chromatography (SEC).** (A) Quantification of EV concentration in each fraction of the SEC from replicate WT vs db/db biological replicates (n=5 independent samples from each genotype) to demonstrate that similar concentrations of EVs recovered in each fraction. (B) Representative controls showing event distribution in a running buffer alone (Blank), Negative Control that has buffer with the fluorescent lipophilic membrane dye vFRed (Cellarcus, San Diego, CA) and no sample, and WT EVs which are samples from a SEC run where the three primary fractions that are recovered in F6-F8 are analyzed with the vFRed dye. In each case, the left column contains plots of size based on calibration with Nanorainbow beads (Cellarcus) vs. Violet SSC-H. The middle column shows diameter vs. count to obtain a size distribution and further supporting the ~110 nm population obtained from PVA sponges. The right column is a distribution of vFRed<sup>+</sup> events vs. Violet SSC-H with concentrated calculated based on events, rate, and volume.

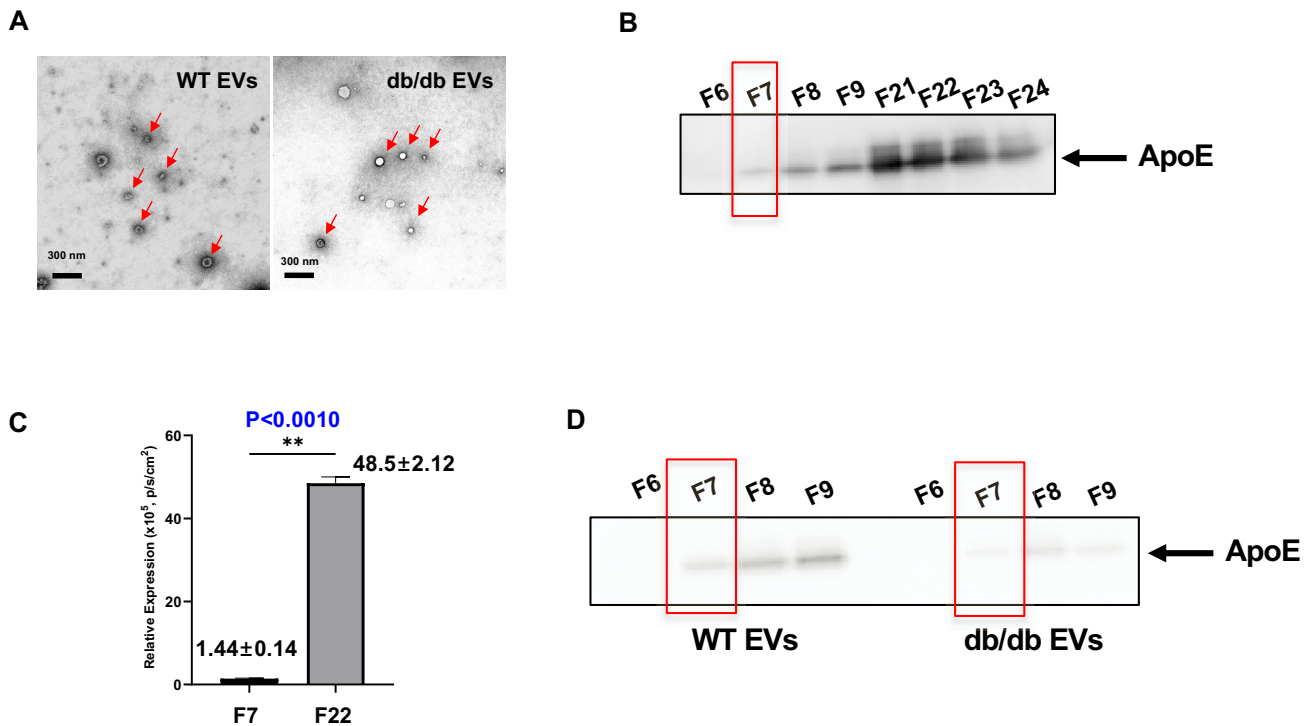

**Figure S3. Characterization of EV fractions via electron microscopy (EM) and immunoblotting to monitor levels of ApoE lipoprotein in EVs.** (A) Representative EM images of WT vs. db/db EVs. (B) Immunoblots to assess the extent to which size exclusion chromatography separates EVs from lipoproteins. Fractions F7 to F9, are the EV-enriched fractions while fractions and F21 to F23 are the ApoE-enriched fractions. Blots were normalized to have the same volume per fraction since the number of EVs was highest in F7 to F9 based on the data provided in Supplementary Figure 2. (C) Quantification of ApoE expression of a peak fraction from the EV-enriched range (F7) vs. the ApoE-enriched range (F22), showing there was 33.6 times lower ApoE in the EV fractions compared to F22 where ApoE containing lipoproteins would be expected to be detected in SEC. (D) For Panel D, the amount of protein added to each lane was normalized to have the same number of EVs for each fraction (i.e., WT vs db/db) based on the data provided in Supplementary Figure 2.

A.

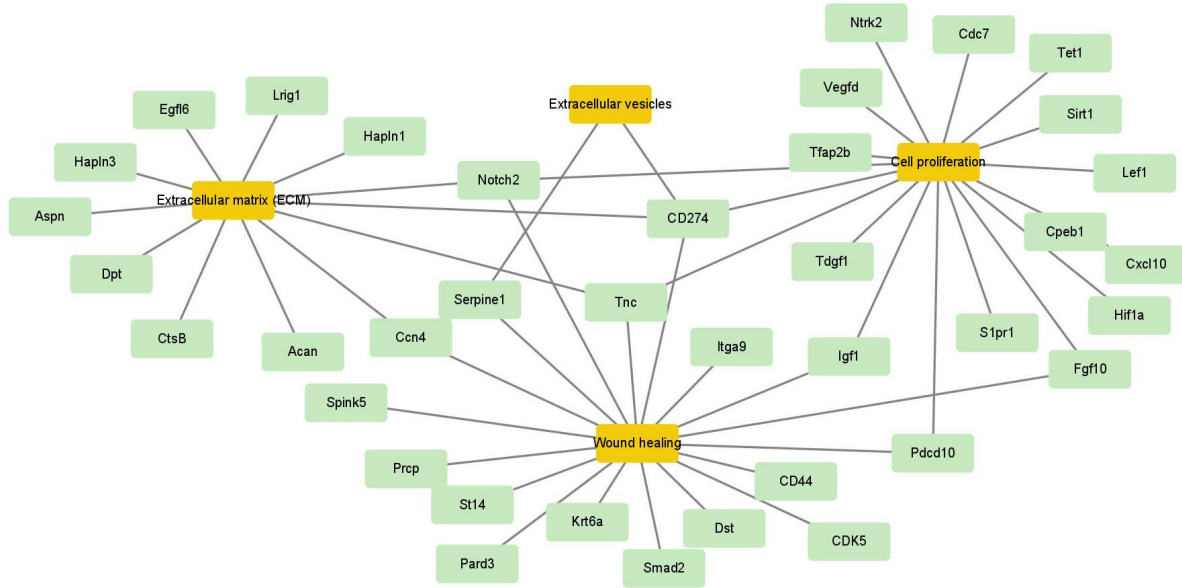

B.

| GO ID      | Transcript ID      | Gene ID             | Symbol   | Gene_Annotation                                                                               | GO Function                    | Target scan Score |
|------------|--------------------|---------------------|----------|-----------------------------------------------------------------------------------------------|--------------------------------|-------------------|
| GO:0016477 | ENSMUST00000154617 | ENSMUSG00000020516  | Rps6kb1  | ribosomal protein S6 kinase, polypeptide 1 [Source:MGI Symbol;Acc:MGI:1270849]                | cell migration                 | 99                |
| GO:0010634 | ENSMUST00000021530 | ENSMUSG00000021109  | Hif1a    | hypoxia inducible factor 1, alpha subunit [Source:MGI Symbol;Acc:MGI:106918]                  | cell migration                 | 98                |
| GO:0030335 | ENSMUST00000130310 | ENSMUSG00000025586  | Cpeb1    | cytoplasmic polyadenylation element binding protein 1 [Source:MGI Symbol;Acc:MGI:108442]      | cell migration                 | 98                |
| GO:0016477 | ENSMUST00000030814 | ENSMUSG00000028969  | CDK5     | cyclin-dependent kinase 5 [Source:MGI Symbol;Acc:MGI:101765]                                  | cell migration                 | 98                |
| GO:0005518 | ENSMUST00000021820 | ENSMUSG00000021388  | Aspn     | asporin [Source:MGI Symbol;Acc:MGI:1913945]                                                   | Collagen binding               | 98                |
| GO:0008284 | ENSMUST00000146028 | ENSMUSG00000020063  | Sirt1    | sirtuin 1 [Source:MGI Symbol;Acc:MGI:2135607]                                                 | Cell proliferation             | 97                |
| GO:0044319 | ENSMUST00000160272 | ENSMUSG00000025812  | Pard3    | par-3 family cell polarity regulator [Source:MGI Symbol;Acc:MGI:2135608]                      | Wound healing                  | 96                |
| GO:0030335 | ENSMUST00000029611 | ENSMUSG00000027855  | Lef1     | lymphoid enhancer binding factor 1 [Source:MGI Symbol;Acc:MGI:96770]                          | cell migration                 | 96                |
| GO:0098633 | ENSMUST00000173598 | ENSMUSG00000006379  | Chadl    | chondroadherin-like [Source:MGI Symbol;Acc:MGI:3036284]                                       | Collagen binding               | 95                |
| GO:0016477 | ENSMUST00000005218 | ENSMUSG00000005087  | CD44     | CD44 antigen [Source:MGI Symbol;Acc:MGI:88338]                                                | cell migration                 | 94                |
| GO:0031012 | ENSMUST00000101126 | ENSMUSG00000030029  | Lig1     | leucine-rich repeats and immunoglobulin-like domains 1 [Source:MGI Symbol;Acc:MGI:107935]     | Extracellular matrix (ECM)     | 93                |
| GO:0030335 | ENSMUST00000161137 | ENSMUSG00000027835  | Pcd10    | programmed cell death 10 [Source:MGI Symbol;Acc:MGI:1928396]                                  | cell migration                 | 92                |
| GO:0008284 | ENSMUST00000038816 | ENSMUSG000000034855 | Cxcl10   | chemokine (C-X-C motif) ligand 10 [Source:MGI Symbol;Acc:MGI:1352450]                         | Cell proliferation             | 92                |
| GO:0031012 | ENSMUST00000005255 | ENSMUSG000000005124 | Ccn4     | cellular communication network factor 4 [Source:MGI Symbol;Acc:MGI:1197008]                   | Extracellular matrix (ECM)     | 92                |
| GO:0008284 | ENSMUST00000079812 | ENSMUSG00000027878  | Notch2   | notch 2 [Source:MGI Symbol;Acc:MGI:97364]                                                     | Cell proliferation             | 90                |
| GO:0010634 | ENSMUST00000022246 | ENSMUSG00000021732  | Fgf10    | fibroblast growth factor 10 [Source:MGI Symbol;Acc:MGI:1099809]                               | cell migration                 | 90                |
| GO:0030335 | ENSMUST00000038816 | ENSMUSG000000034855 | Cxcl10   | chemokine (C-X-C motif) ligand 10 [Source:MGI Symbol;Acc:MGI:1352450]                         | cell migration                 | 86                |
| GO:0008284 | ENSMUST00000129938 | ENSMUSG00000029283  | Cdc7     | cell division cycle 7 (S. cerevisiae) [Source:MGI Symbol;Acc:MGI:1309511]                     | Cell proliferation             | 84                |
| GO:0030335 | ENSMUST00000205460 | ENSMUSG00000030789  | Itgax    | integrin alpha X [Source:MGI Symbol;Acc:MGI:96609]                                            | cell migration                 | 83                |
| GO:0070062 | ENSMUST00000041388 | ENSMUSG00000037411  | Serpine1 | serine (or cysteine) peptidase inhibitor, clade E, member 1 [Source:MGI Symbol;Acc:MGI:97608] | Extracellular vesicles         | 82                |
| GO:0030335 | ENSMUST00000197460 | ENSMUSG00000032494  | Tgf1     | teratocarcinoma-derived growth factor 1 [Source:MGI Symbol;Acc:MGI:98658]                     | cell migration                 | 81                |
| GO:0016477 | ENSMUST00000146179 | ENSMUSG00000020282  | Rhbf1    | rhomboid 5 homolog 1 [Source:MGI Symbol;Acc:MGI:104328]                                       | cell migration                 | 78                |
| GO:0008284 | ENSMUST00000033751 | ENSMUSG000000031380 | Vegfd    | vascular endothelial growth factor D [Source:MGI Symbol;Acc:MGI:108037]                       | Cell proliferation             | 76                |
| GO:0008284 | ENSMUST00000030056 | ENSMUSG00000028364  | Tnc      | tenascin C [Source:MGI Symbol;Acc:MGI:101922]                                                 | Cell proliferation             | 76                |
| GO:0030335 | ENSMUST00000095360 | ENSMUSG00000020053  | Igf1     | insulin-like growth factor 1 [Source:MGI Symbol;Acc:MGI:96432]                                | cell migration                 | 73                |
| GO:0008284 | ENSMUST00000224259 | ENSMUSG00000055254  | Ntrk2    | neurotrophic tyrosine kinase, receptor, type 2 [Source:MGI Symbol;Acc:MGI:97384]              | Cell proliferation             | 71                |
| GO:0005581 | ENSMUST00000036737 | ENSMUSG000000038591 | Colec10  | collectin sub-family member 10 [Source:MGI Symbol;Acc:MGI:3606482]                            | Collagen binding               | 71                |
| GO:0008284 | ENSMUST00000050826 | ENSMUSG000000047146 | Tet1     | tet methylcytosine dioxygenase 1 [Source:MGI Symbol;Acc:MGI:1098693]                          | Cell proliferation             | 70                |
| GO:0004867 | ENSMUST00000069245 | ENSMUSG00000055561  | Spink5   | serine peptidase inhibitor, Kazal type 5 [Source:MGI Symbol;Acc:MGI:1919682]                  | serine-type inhibitor activity | 70                |
| GO:0008284 | ENSMUST00000027059 | ENSMUSG00000025927  | Tfap2b   | transcription factor AP-2 beta [Source:MGI Symbol;Acc:MGI:104672]                             | Cell proliferation             | 69                |
| GO:0042060 | ENSMUST00000168423 | ENSMUSG00000024563  | Smad2    | SMAD family member 2 [Source:MGI Symbol;Acc:MGI:108051]                                       | Wound healing                  | 69                |
| GO:0030335 | ENSMUST00000016640 | ENSMUSG000000016496 | CD274    | CD274 antigen [Source:MGI Symbol;Acc:MGI:1926446]                                             | cell migration                 | 67                |
| GO:0016477 | ENSMUST00000055676 | ENSMUSG000000045092 | S1pr1    | sphingosine-1-phosphate receptor 1 [Source:MGI Symbol;Acc:MGI:1096355]                        | cell migration                 | 66                |
| GO:0008236 | ENSMUST00000076052 | ENSMUSG000000061119 | Prpc     | prolylcarboxypeptidase (angiotensinase C) [Source:MGI Symbol;Acc:MGI:1919711]                 | serine-type peptidase          | 66                |
| GO:0004252 | ENSMUST00000234712 | ENSMUSG00000033825  | Tpsb2    | trypsin beta 2 [Source:MGI Symbol;Acc:MGI:96942]                                              | serine-type peptidase          | 63                |
| GO:0016477 | ENSMUST00000021028 | ENSMUSG000000020689 | Itgb3    | integrin beta 3 [Source:MGI Symbol;Acc:MGI:96612]                                             | cell migration                 | 55                |
| GO:0005581 | ENSMUST00000170091 | ENSMUSG00000025044  | Msr1     | macrophage scavenger receptor 1 [Source:MGI Symbol;Acc:MGI:98257]                             | Collagen binding               | 54                |
| GO:0016477 | ENSMUST00000123557 | ENSMUSG000000031995 | St14     | suppression of tumorigenicity 14 (colon carcinoma) [Source:MGI Symbol;Acc:MGI:1338881]        | cell migration                 | 50                |
| GO:0042060 | ENSMUST00000183302 | ENSMUSG000000026131 | Dst      | dystonin [Source:MGI Symbol;Acc:MGI:104627]                                                   | Wound healing                  | 50                |

Figure S4. GO term analysis of candidate miR-425-5p targets.

(A) Interaction map highlighting potential relevance of miR-425-5p on cell proliferation, cell migration, and wound healing. (B) Table listing GO term-based target scan scores.

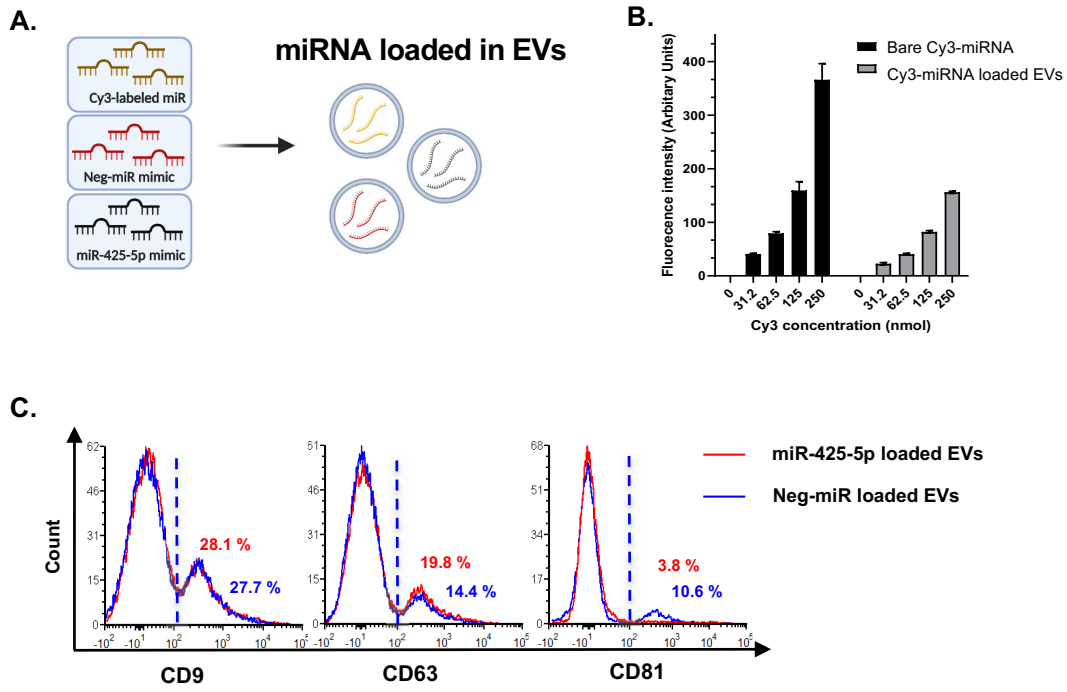

**Figure S5. Optimization and encapsulation efficiency of miR-425-5p in EVs.**

(A) Schematic of miRNA loading of EVs isolated from WT PVA sponge implants using Exofect per manufacturer's recommendation (Systems Biosciences, SBI). Neg-miR (cel-miR-67), miR-425-5p, and Cy3-labeled miRNA were compared, the Cy3-miRNA was provided as an internal control from SBI for titrating EV loading with respect to the amount of miRNA added. (B) Optimization of conditions for the encapsulation Cy-labeled miRNAs EVs using miRNAs in a range of 31-250 nmoles in a volume of 100  $\mu$ L using a fluorescence plate reader. (C) Measurement of encapsulation efficiency based on Cy3-miRNA levels in EVs. (E) vFC using antibodies directed to the tetraspanins showing that the levels of CD9, CD63 and CD81 were unchanged between loading with miR-425-5p vs. Neg-miR loaded EVs before use for in vivo studies. Red line: miR-425-5p loaded EVs. Blue line: Neg-miR loaded EVs.

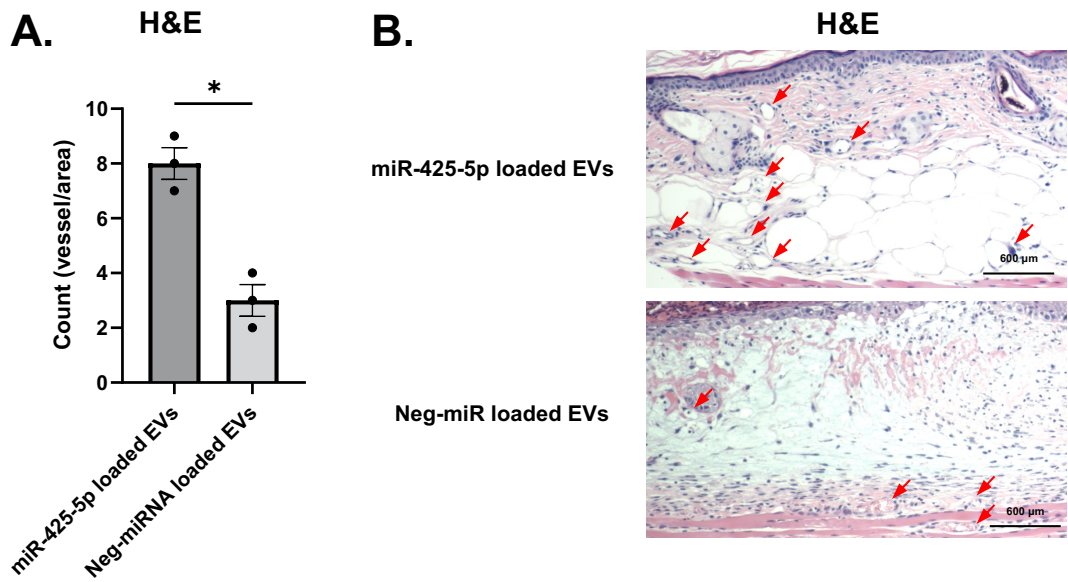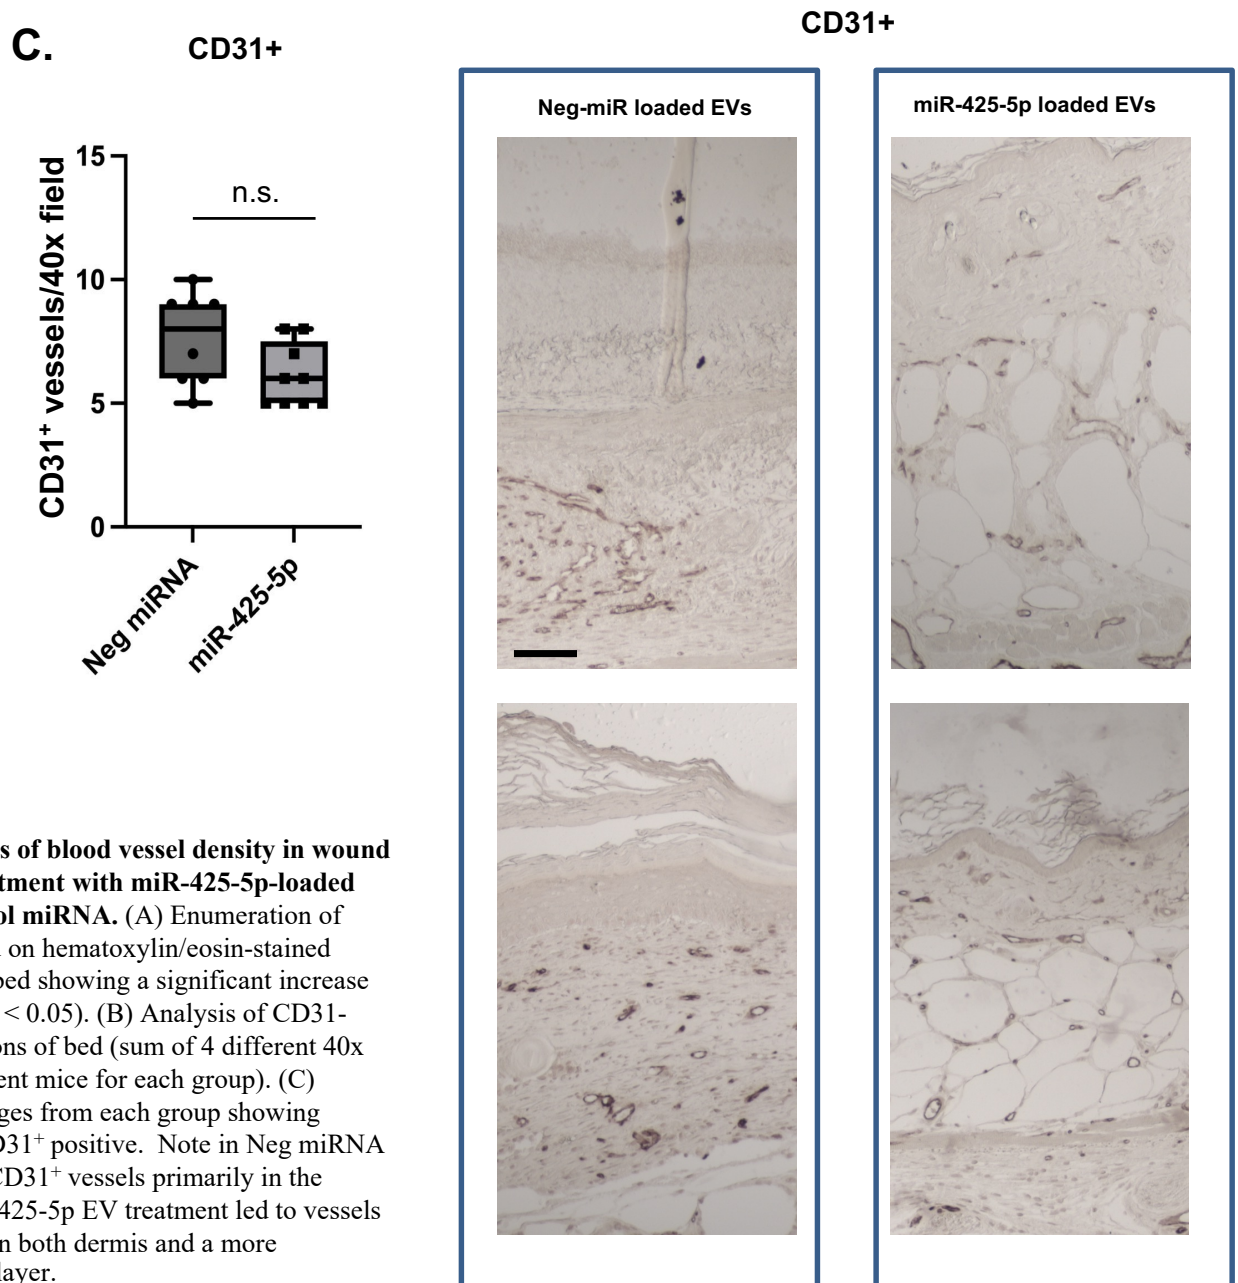

**Figure S6. Analysis of blood vessel density in wound bed following treatment with miR-425-5p-loaded EVs vs. Neg control miRNA.** (A) Enumeration of blood vessels based on hematoxylin/eosin-stained sections of wound bed showing a significant increase in vessel density ( $P < 0.05$ ). (B) Analysis of CD31-stained tissue sections of bed (sum of 4 different 40x fields from 2 different mice for each group). (C) Representative images from each group showing similar levels of CD31<sup>+</sup> positive. Note in Neg miRNA EV treatment had CD31<sup>+</sup> vessels primarily in the dermis, while miR-425-5p EV treatment led to vessels widely distributed in both dermis and a more prominent adipose layer.

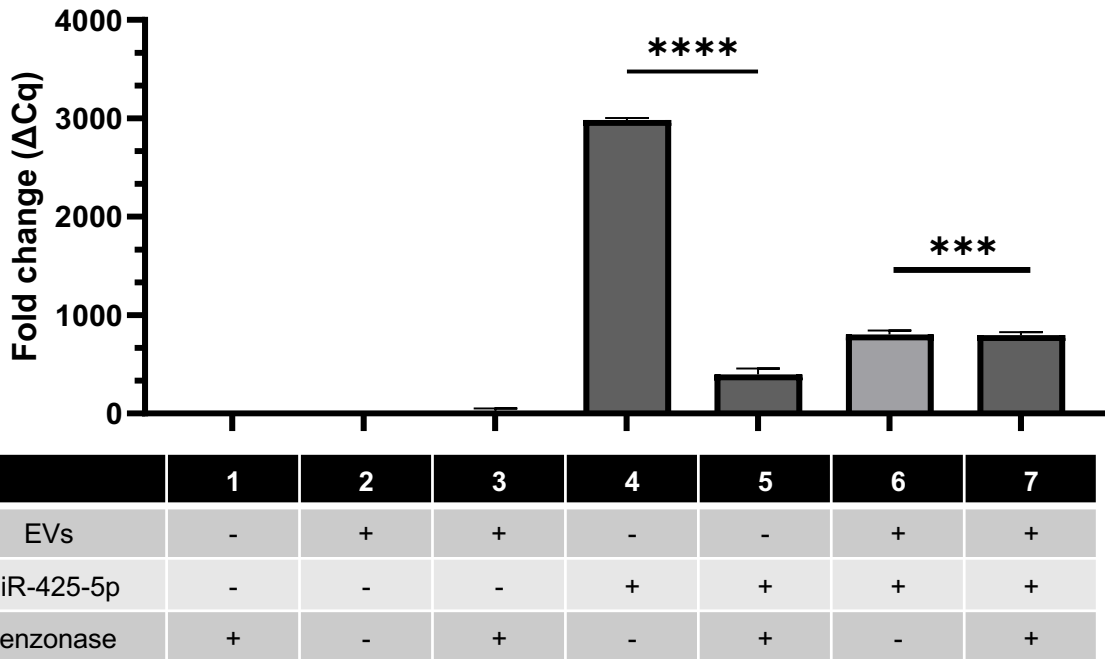

**Figure S7. Demonstration that EVs loaded with miR-425-5p were resistant to treatment with the nuclease benzonase.** Incubation of nanoparticles such as EVs with benzonase can be used to determine whether nucleic acid payloads are on the surface or contained within a particle. Here we show that while treatment with benzonase degraded free miR-425-5p (Groups 4 and 5), treatment of EVs loaded with miR-425-5p did not show a significant reduction (Groups 6 and 7). We treated miR-loaded EVs, prepared using Exofect as described in the materials and methods ( $2.8 \times 10^8$  EVs), with benzonase nuclease (10 Unit/ $\mu$ L, 3 min). RNA was extracted with a mirVana™ miRNA Isolation Kit (Cat#AM1560, Thermo Fisher, Carlsbad, CA), and cDNA synthesized with the TaqMan™ Advanced miRNA cDNA Synthesis Kit (Cat# A28007, Thermo Fisher). qRT-PCR was performed on CFX96 (Bio-Rad) using the TaqMan™ Fast Advanced Master Mix for qPCR (Cat# 4444556, Thermo Fisher) and TaqMan™ Advanced miRNA Assay (mmu481161\_mir) (Cat# A25576, Thermo Fisher). PCR reaction followed manufacturer's recommendations using the FAM fluorophore (Cycles: 95°C for 20 sec followed by 40 cycles of 95°C for 3 sec and 60°C 30 sec).



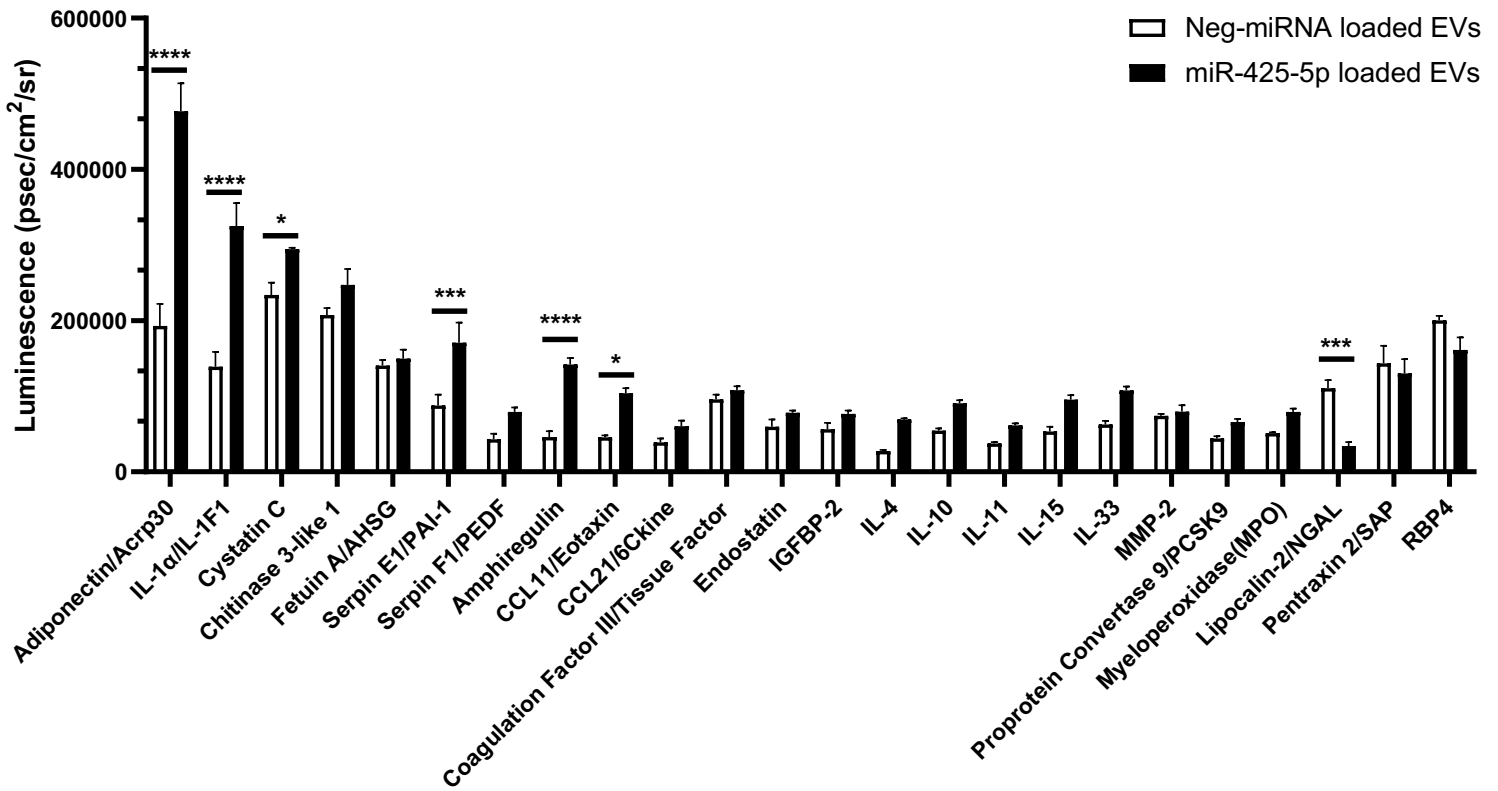

**Figure S8. Bar graph of cytokine changes identified after treatment of miR-425-5p-loaded EVs vs. Neg-miRNA loaded EVs to the diabetic wounds.** Adiponectin, IL-1 $\alpha$ , Cystatin C, Serpin E1, Amphiregulin, and CCL11 were significantly increased when miR-425-5p-loaded EVs were treated to diabetic wounds. Conversely, Lipocalin-2 was significantly reduced when miR-425-5p-loaded EVs were treated to diabetic wounds. (p-value: \*\*\*\*<0.0001, \*\*\*<0.001, \*<0.05 by Student t-test).

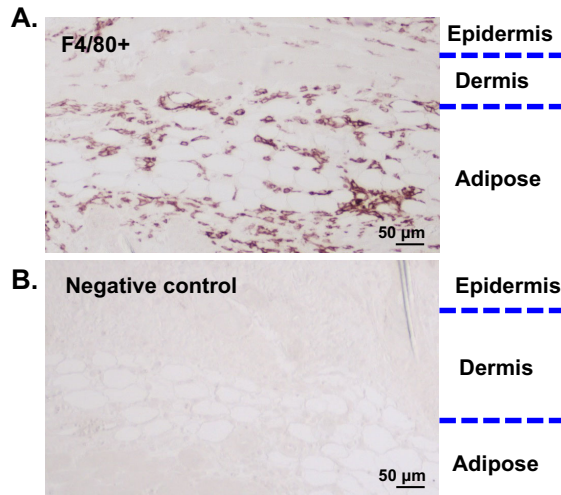

**Figure S9. Expression of F4/80 positive macrophages generated in naïve adipose tissue.**

(A) Localization of F4/80-positive cells in full thickness sections of mouse skin. (B) Negative control for the above using a secondary and detection reagent without the primary antibody.

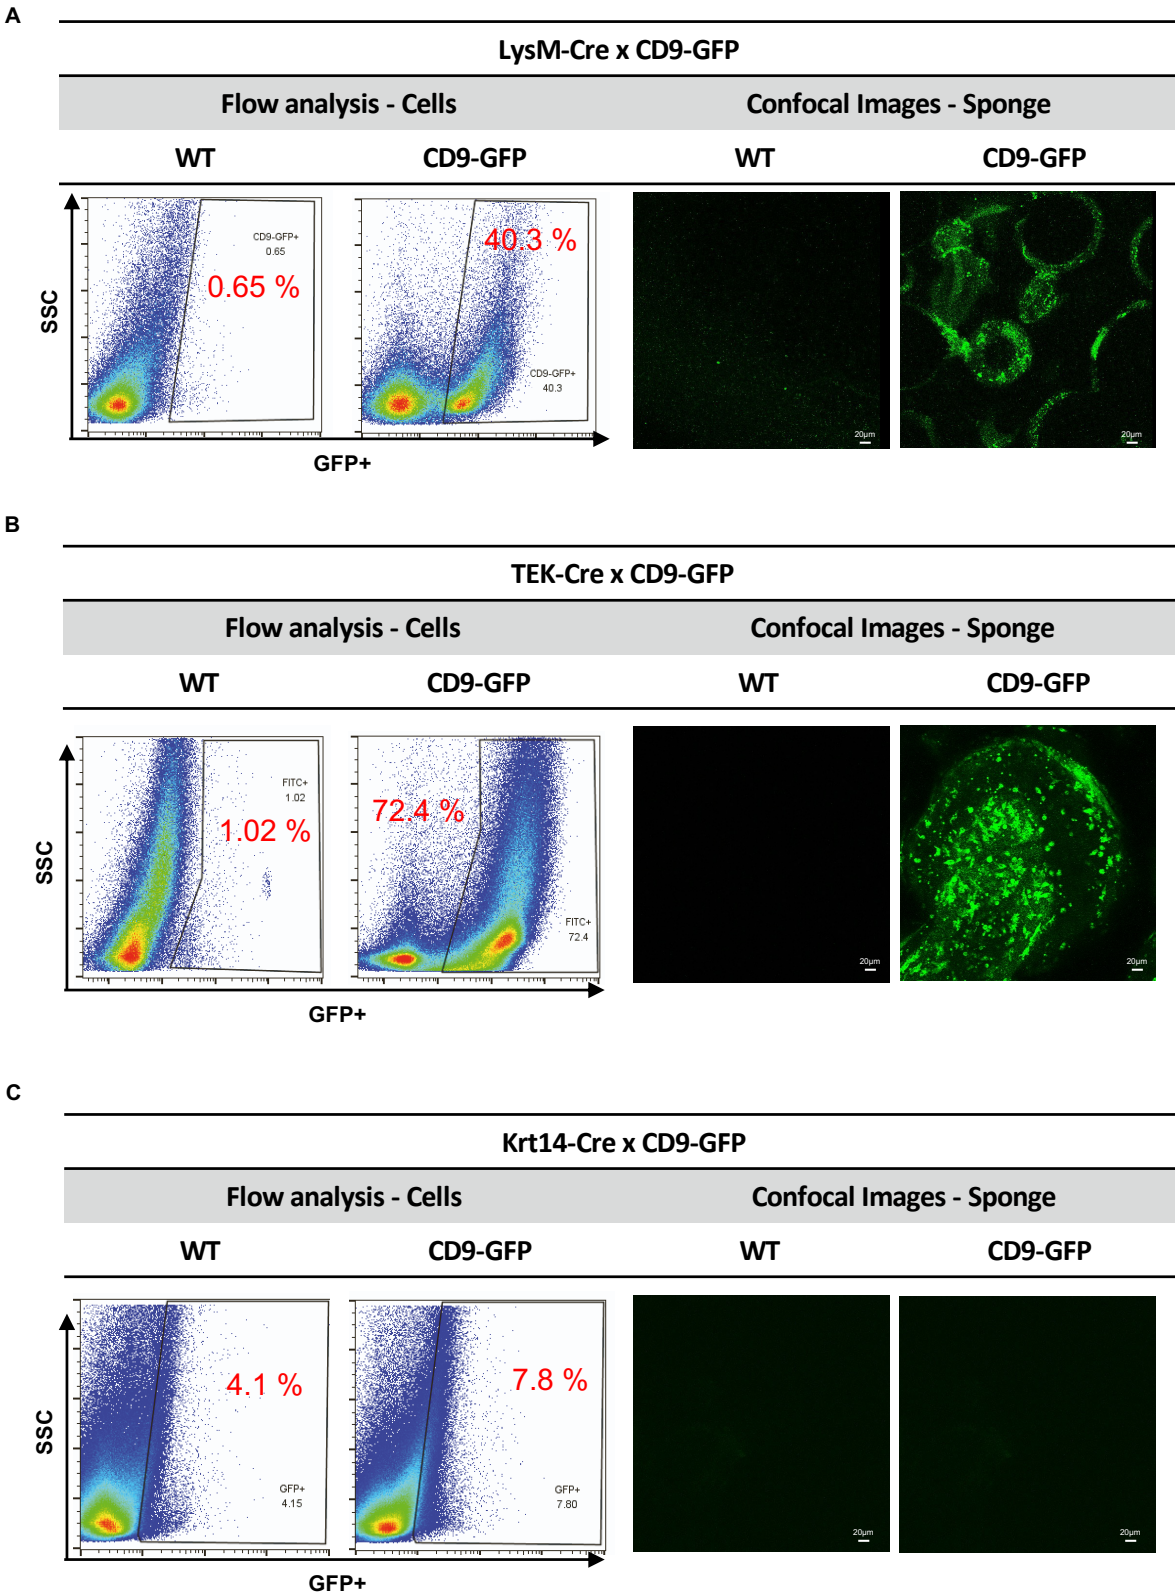

**Figure S10. Analysis of GFP<sup>+</sup> cells by flow cytometry and confocal microscopy to support EV analyses using cell-type specific promoter models. (A) Analysis of cells PVA sponge implants harvested from macrophage LysM-Cre x CD9-GFP vs. WT control mice. (B) Cells from endothelial TEK-Cre x CD9-GFP mice. (C) Cells from keratinocyte Krt14-Cre x CD9-GFP mice.**

**Table S1. The list of genes associated with each cell type identified by scRNAseq.**

| <i>Cell Type</i>       | <i>Gene</i> | <i>References</i>                                                                        |
|------------------------|-------------|------------------------------------------------------------------------------------------|
| <i>Macrophages</i>     | TREM2       | Macrophage marker, inflammation and, atherosclerosis (PMID <a href="#">35942822</a> )    |
|                        | IGF1        | Adipocyte Macrophage crosstalk in obesity (PMID <a href="#">28585206</a> )               |
|                        | H2-DMB1     | Macrophages in a fatty liver disease (PMID <a href="#">37474470</a> )                    |
|                        | MS4A4C      | Member of MS4A tetraspan family that modulates TREM2 ( <a href="#">31413141</a> )        |
| <i>Neutrophils</i>     | S100A8      | S100A8/A9 in inflammation (PMID <a href="#">29942307</a> )                               |
|                        | S100A9      | Oxidative stress in neutrophils in diabetes (PMID <a href="#">34148367</a> )             |
|                        | CSF3        | Neutrophil-mediated inflammation responses in infection (PMID <a href="#">29883484</a> ) |
| <i>Dendritic cells</i> | CCR7        | Regulation of DCs in migration and inflammation (PMID <a href="#">35281921</a> )         |
|                        | ZBTB46      | Transcriptional control of DCs (PMID <a href="#">31759434</a> )                          |
| <i>Lymphocytes</i>     | CD3D        | T lymphocytes regulating scarring in wound healing (PMID <a href="#">31637099</a> )      |
|                        | CD4E        | T cells in adverse cutaneous reactions (PMID <a href="#">31395875</a> )                  |
|                        | CD3G        | T cell subsets in burn wounds (PMID <a href="#">28575063</a> )                           |
|                        | LTB         | Leukotrienes in regulation of lymphoid cells (PMID <a href="#">30477730</a> )            |

**Table S2. The list of up- and down- regulated miRNAs with target pathway and genes.**

|                        | <i>miRNA</i>    | <i>Candidate Target pathway (miRPathDB v.2.0)</i> | <i>Gene Targets Observed in Proteome Profiler (Fig 6J) (TargetScanMouse V.7.1)</i> | <i>References</i>                                                                                                                                                                                   |
|------------------------|-----------------|---------------------------------------------------|------------------------------------------------------------------------------------|-----------------------------------------------------------------------------------------------------------------------------------------------------------------------------------------------------|
| <b>Down-regulation</b> | mmu-miR-425-5p  | Dysregulated in Insulin/PI3K-AKT Signaling        | SERPIN E1( <a href="#">ENSMUST00000041388.11</a> )                                 | Endothelial pro-survival, Angiogenesis, wound repair (PMID 35474734)<br>Adipose stem cell exosomes, regulate macrophage polarization, cardiac repair (PMID 35894060)                                |
|                        | mmu-miR-186-5p  | Hippo signaling pathway                           | IL-15 ( <a href="#">ENSMUST00000034148.7</a> )                                     | Wound healing, infection, immunoregulation (PMID 33017084)<br>Wound healing, macrophage migration, proliferation (PMID 37565786)                                                                    |
|                        | mmu-miR-142a-5p | Focal adhesion                                    | -                                                                                  | Promotes dendritic cell maturation (PMID 35668915)<br>Control profibrogenic macrophage (PMID 26436920)                                                                                              |
|                        | mmu-miR-361-3p  | Proteoglycans in cancer                           | -                                                                                  | Wound healing, Migration, proliferation (PMID 34475974)                                                                                                                                             |
|                        | mmu-miR-3068-3p | Metabolic pathways                                | -                                                                                  | Wound healing, proliferation, inflammatory cell recruitment (PMID 30487794)<br>Ischemic stroke, neuronal injury, excitotoxicity (PMID 31792968)                                                     |
| <b>Up-regulation</b>   | mmu-let-7e-5p   | Inflammatory response pathway                     | IL-10 ( <a href="#">ENSMUST00000016673.6</a> )                                     | Inflammation, Oxidative stress, insulin signaling (PMID 33445738)<br>Inflammation, endotoxemia responses (PMID 33993048)                                                                            |
|                        | mmu-miR-409-5p  | Bacterial invasion of epithelial cells            | -                                                                                  | Epithelial-mesenchymal transition, Tumorigenesis (PMID 25065597)<br>Regulates Wnt/beta catenin signaling (PMID 31165485)                                                                            |
|                        | mmu-miR-181b-5p | MAPK signaling pathway                            | SERPIN E1( <a href="#">ENSMUST00000041388.11</a> )                                 | Wound healing, proliferation, inhibit apoptosis (PMID 30783419)<br>Diabetic wounds, senescence, angiogenesis, wound healing (PMID 35528840)                                                         |
|                        | mmu-miR-541-5p  | ErbB signaling pathway                            | -                                                                                  | Proliferation, hyperglycemia-induced migration, angiogenesis dysfunction (PMID 36291965)<br>Cell differentiation, proliferation, innate immune response, anticoagulation mechanisms (PMID 37996554) |

**Table S3. The list of animals and cell line.**

| NAME                                                       | SOURCE      | CATALOG # |
|------------------------------------------------------------|-------------|-----------|
| C57B6/J                                                    | Jackson lab | JAX000664 |
| Lep <sup>r<sup>db/db</sup></sup>                           | Jackson lab | JAX000697 |
| B6.129P2-Lyz2 <sup>tm1(cre)lf0</sup> /J                    | Jackson lab | JAX004781 |
| B6.Cg-Tg(Tek-cre)12Flv/J                                   | Jackson lab | JAX004128 |
| B6N.Cg-Tg(KRT14-cre)1Amc/J                                 | Jackson lab | JAX018964 |
| B6;129S1-Gt(ROSA)26Sort <sup>tm1(CAG-CD9/GFP)Dmfl</sup> /J | Jackson lab | JAX033361 |
| HEK293T                                                    | ATCC        | CRL-1573  |
| Mouse embryonic fibroblasts (MEFs)                         | ATCC        | SCRC-1008 |

**Table S4. The list of critical commercial assays kit.**

| NAME                                    | SOURCE                | CATALOG #              |
|-----------------------------------------|-----------------------|------------------------|
| Chromium Next GEM Single Cell 3' Kit    | 10X Genomics          | Cat# 1000269 (ver 3.1) |
| vFC analysis assay kit                  | Cellarcus Biosciences | Cat# CBS4HP-1PE        |
| ExoQuick kit-TC                         | System Biosciences    | Cat# EQUltra-20A-1     |
| MACSPlex Exosome Kit, mouse             | Miltenyi Biotec       | Cat# 130-122-211       |
| BCA assay kit                           | Thermo Fisher         | Cat# 23225             |
| Exo-Fect <sup>TM</sup> Transfection kit | System Biosciences    | Cat# EXFT20A-1         |
| Mouse XL Cytokine Array kit             | R & D Systems         | Cat# ARY028            |

**Table S5. The list of oligonucleotides for miRNA assay and Taqman qPCR.**

| <b>NAME</b>                                              | <b>SOURCE</b>      | <b>CATALOG #</b>      |
|----------------------------------------------------------|--------------------|-----------------------|
| miR-425-5p mimic                                         | Horizon            | Cat# C-310988-01-0050 |
| Negative-miR mimic (cel-miR-67; from <i>C. elegans</i> ) | Horizon            | Cat# CN-001000-01-50  |
| Cy3-labeled miR (from SBI Kit)                           | System Biosciences | Cat# EXFT20A-1        |
| mirVana™ miRNA Isolation Kit, with phenol                | Thermo Fisher      | Cat# AM1560           |
| TaqMan™ Advanced miRNA cDNA Synthesis Kit                | Thermo Fisher      | Cat# A28007           |
| TaqMan™ Fast Advanced Master Mix for qPCR                | Thermo Fisher      | Cat# 4444556          |
| TaqMan™ Advanced miRNA Assay (mmu481161_mir)             | Thermo Fisher      | Cat# A25576           |

**Table S6. Antibodies for immunoblotting and vFC.**

| <b>Antibodies</b>                                                                           |                       |                    |
|---------------------------------------------------------------------------------------------|-----------------------|--------------------|
| <b>NAME</b>                                                                                 | <b>SOURCE</b>         | <b>CATALOG #</b>   |
| CD9-PE (mouse)                                                                              | Miltenyi Biotec       | Cat# 130-123-052   |
| CD81-PE (mouse)                                                                             | Miltenyi Biotec       | Cat# 130-102-632   |
| CD63-PE (mouse)                                                                             | Miltenyi Biotec       | Cat# 130-123-289   |
| MHC class I-PE (mouse)                                                                      | Biolegend             | Cat# 114607        |
| CD29-PE (mouse)                                                                             | Miltenyi Biotec       | Cat# 130-119-165   |
| CD274(PD-L1)-PE (mouse)                                                                     | Biolegend             | Cat# 124307        |
| CD39-PE (mouse)                                                                             | Miltenyi Biotec       | Cat# 130-114-357   |
| CD44-PE (mouse)                                                                             | Miltenyi Biotec       | Cat# 130-118-694   |
| CD45-PE (mouse)                                                                             | Miltenyi Biotec       | Cat# 130-110-797   |
| CD11b-PE (mouse)                                                                            | Miltenyi Biotec       | Cat# 130-113-806   |
| CD54(ICAM-1)-PE (mouse)                                                                     | Miltenyi Biotec       | Cat# 130-104-214   |
| CD49e-PE (mouse)                                                                            | Miltenyi Biotec       | Cat# 130-122-072   |
| CD24-PE (mouse)                                                                             | Miltenyi Biotec       | Cat# 130-110-826   |
| CD126(IL-6R)-PE (mouse)                                                                     | Biolegend             | Cat# 115806        |
| CD66a-PE (mouse)                                                                            | Miltenyi Biotec       | Cat# 130-125-525   |
| CD326(Ep-CAM)-PE (mouse)                                                                    | Biolegend             | Cat# 118205        |
| Isotype-PE                                                                                  | Miltenyi Biotec       | Cat# 130-113-450   |
| Anti-Alix (E6P9B) mAb (mouse)                                                               | Cell signaling        | Cat# 92880         |
| Anti-CD9 (mouse)                                                                            | Thermo Fisher         | Cat# PA5-85955     |
| Anti-CD81 (D5O2Q) (mouse)                                                                   | Cell signaling        | Cat# 10037         |
| Anti-CD63 (mouse)                                                                           | Thermo Fisher         | Cat# PA5-92370     |
| Anti-FLAG antibody                                                                          | Sigma Aldrich         | Cat# F-1804        |
| Anti-mouse IgG, HRP-linked antibody                                                         | Cell signaling        | Cat# 7076          |
| Anti-rabbit IgG, HRP-linked antibody                                                        | Cell signaling        | Cat# 7074          |
| Anti-Rabbit HRP Polymer                                                                     | Cell IDX              | Cat# 2RH-100       |
| Ki-67 Rabbit monoclonal Antibody (1:50)                                                     | GeneTex               | Cat# 16667         |
| Vimentin (D21H3) mAb                                                                        | Cell signaling        | Cat# 5741          |
| Goat anti-Rabbit IgG-Alexa Fluor 546                                                        | Thermo Fisher         | Cat# A11010        |
| Goat anti-Mouse IgG-Alexa Fluor 546                                                         | Thermo Fisher         | Cat# A11030        |
| Anti-FLAG-vTag <sup>TM</sup> Antiodody                                                      | Cellarcus Biosciences | Cat# CBS18-PE-100T |
| Goat anti-Rabbit IgG (H+L) Cross-Adsorbed Secondary Antibody, Alexa Fluor <sup>TM</sup> 488 | Thermo Fisher         | Cat# A-11008       |
| ApoE                                                                                        | Cell signaling        | Cat#49285          |



**Table S7. The list of chemicals and sources.**

| <b>Antibodies</b>                                                                 |                       |                                   |
|-----------------------------------------------------------------------------------|-----------------------|-----------------------------------|
| <b>NAME</b>                                                                       | <b>SOURCE</b>         | <b>CATALOG #</b>                  |
| DMEM-high glucose medium                                                          | Thermo Fisher         | Cat# 12430054                     |
| Fetal Bovine Serum (FBS)                                                          | Sigma Aldrich         | Cat# F0926                        |
| Antibiotic-Antimycotic (100X)                                                     | Thermo Fisher         | Cat# 15240062                     |
| Lipofectamine 3000                                                                | Thermo Fisher         | Cat# L3000150                     |
| RIPA Lysis and Extraction Buffer                                                  | Thermo Fisher         | Cat# 89901                        |
| Tissue-Tek® O.C.T. Compound                                                       | Sakura                | Cat# 4583                         |
| Trizol                                                                            | Thermo Fisher         | Cat# 15596018                     |
| RNA 6000 Nano                                                                     | Agilent               | Cat# 5067-1511                    |
| NEB Next® Magnesium RNA Fragmentation Module                                      | NEB                   | Cat# e6150                        |
| Super Script™ II Reverse Transcriptase                                            | Invitrogen            | Cat# 1896649                      |
| DNA polymerase I (E.coli)                                                         | NEB                   | Cat# m0209                        |
| RNase H                                                                           | NEB                   | Cat# m0297                        |
| dUTP Solution                                                                     | Thermo Fisher         | Cat# R0133                        |
| UDG enzyme                                                                        | NEB                   | Cat# m0280                        |
| PVA sponge (7mm x 3mm Disk)                                                       | PVA Unlimited Inc.    | Cat# SQ5000<br>PVA; PO#PR00440056 |
| Oasis Nylon Suture                                                                | Thermo Fisher         | Cat# MV-663-V-19mm                |
| Betadine (10% povidone-iodine topical solution)                                   | Thermo Fisher         | Cat# NDC 67618-150-01             |
| 4 mm punch                                                                        | Thermo Fisher         | Cat# P450                         |
| Silicone ring (Thickness: 0.5 mm, outside diameter: 12 mm, inside diameter: 6 mm) | MCS                   | Cat# 33350174                     |
| Surgical glue                                                                     | Thermo Fisher         | Cat# 1469SB                       |
| Tegaderm                                                                          | 3M                    | Cat# 1622w                        |
| qEV1-column                                                                       | IZON                  | Cat# ICI-70                       |
| MACSQuant Running Buffer                                                          | Miltenyi Biotec       | Cat# 130-092-747                  |
| 10% BSA stock solution                                                            | Miltenyi Biotec       | Cat# 130-091-376                  |
| vCal™ nano rainbow beads                                                          | Cellarcus Biosciences | Cat# CBS6M                        |
| vFRed dye                                                                         | Cellarcus Biosciences | Cat# CBS4A                        |
| vFC staining buffer                                                               | Cellarcus Biosciences | Cat# CBS0                         |
| Liposome control                                                                  | Cellarcus Biosciences | Cat# CBS1                         |
| mouse platelet derived EVs                                                        | Cellarcus Biosciences | Cat# CBS2                         |
| 96-well v bottom plate                                                            | Sarstedt              | Cat# NC0068972                    |
| NuPAGE™ LDS Sample Buffer                                                         | Thermo Fisher         | Cat# NP0008                       |
| 1 mm pre-cast 12% Bis-Tris Mini Gel                                               | Thermo Fisher         | Cat# NP0342BOX                    |
| PVDF membrane                                                                     | Thermo Fisher         | Cat# LC2005                       |
| Memcode stain                                                                     | Thermo Fisher         | Cat# 24585                        |
| Pierce™ ECL Reagent                                                               | Thermo Fisher         | Cat# 32209                        |
| 1X Tris-buffered saline                                                           | CST                   | Cat# 9997                         |
| EM grids                                                                          | Ted Pella, Inc.       | Cat# 01754-F                      |
| Benzonase                                                                         | Sigma Aldrich         | Cat# E1014-5kU                    |

**Table S8. The list of analysis software and equipment.**

| NAME                                         | SOURCE                    | CATALOG #                                                                                                                                                       |
|----------------------------------------------|---------------------------|-----------------------------------------------------------------------------------------------------------------------------------------------------------------|
| HiSeq sequencers                             | Illumina                  | <a href="https://www.illumina.com/systems/sequencing-platforms/hiseq-x.html">https://www.illumina.com/systems/sequencing-platforms/hiseq-x.html</a>             |
| MACSQuant 10 (ver 2.13.2)                    | Miltenyi Biotec           | <a href="https://www.miltenyibiotec.com/US-en/products/macsqunt-analyzer-10.html">https://www.miltenyibiotec.com/US-en/products/macsqunt-analyzer-10.html</a>   |
| AXR confocal microscopy                      | Nikon                     | <a href="http://www.microscope.healthcare.nikon.com">http://www.microscope.healthcare.nikon.com</a>                                                             |
| Jeol 1400 plus TEM                           | Jeol USA                  | <a href="https://www.jeol.com/product/scientific/tem">https://www.jeol.com/product/scientific/tem</a>                                                           |
| Illumina Novaseq <sup>TM</sup> 6000 platform | Illumina                  | <a href="https://www.illumina.com/systems/sequencing-platforms/">https://www.illumina.com/systems/sequencing-platforms/</a>                                     |
| GraphPad Prism9 software                     | GraphPad Software         | <a href="https://www.graphpad.com/">https://www.graphpad.com/</a>                                                                                               |
| CytoFLEX S (Ver. 2.10)                       | Beckman Coulter           | <a href="https://www.beckman.com/flow-cytometry/research-flow-cytometers/cytoflex">https://www.beckman.com/flow-cytometry/research-flow-cytometers/cytoflex</a> |
| Xenogen IVIS-Lumina                          | Caliper life science Inc. | <a href="http://www.caliperls.com/assets/014/7156.pdf">http://www.caliperls.com/assets/014/7156.pdf</a>                                                         |
| Flowjo software (ver 10.7.1)                 | Flowjo, LLC               | <a href="https://www.flowjo.com/">https://www.flowjo.com/</a>                                                                                                   |
| Cytoscape                                    | NIGMS                     | <a href="https://cytoscape.org/">https://cytoscape.org/</a>                                                                                                     |
| Image J                                      | NIH                       | <a href="https://imagej.nih.gov/ij/download.html">https://imagej.nih.gov/ij/download.html</a>                                                                   |
| OMERO                                        | OME                       | <a href="https://www.openmicroscopy.org/omero/">https://www.openmicroscopy.org/omero/</a>                                                                       |
| FCS express                                  | De Novo                   | <a href="https://denovosoftware.com/">https://denovosoftware.com/</a>                                                                                           |
| R statistical language (ver. 3.3.3)          | R foundation              | <a href="https://www.r-project.org/">https://www.r-project.org/</a>                                                                                             |
